# Supplementary material for: The structural and magnetic properties of BaFe12O19nanoparticles: effect of residual sodium ions
Source: Royal Society of Chemistry journal article supplement (doi:10.1039/d1dt02745j), 2021-01-01
Supplement: d1dt02745j1.pdf [file d1dt02745j1.pdf]

# The structural and magnetic properties of BaFe<sub>12</sub>O<sub>19</sub> nanoparticles: Effect of residual sodium ions

*Jae-Young Choi, Jeong-Min Lee, Youn-Kyung Baek, Jung-Goo Lee and Young-Kuk Kim\**

Dept of Magnetic Materials, Korea Institute of Materials Science, 797 Changwondaero,  
Changwon, 51508, Korea

- 1. Chemical composition of the synthesized BaFe<sub>12</sub>O<sub>19</sub> nanoparticles using NaOH as a pH modifier to precipitate hydroxides. Here, composition of nanoparticles was characterized with Energy dispersive spectroscopy (EDS) for powdered samples.**

Table S1. Chemical composition of the nanoparticles prepared with NaOH and without NaOH. The chemical composition is denoted with molar ratio normalized with molar amount of Ba.

| Sample                       | Fe   | Ba | Na         | Cl   | Si  | Cu  | Zn  |
|------------------------------|------|----|------------|------|-----|-----|-----|
| 800C 1h (NaOH)               | 11.4 | 1  | <b>2.2</b> | 0.9  | 0.1 | -   | -   |
| 900C 8h (NaOH)               | 11.9 | 1  | <b>1.9</b> | 1.6  | 0.1 | -   | -   |
| 900C 8h (NH <sub>4</sub> OH) | 13.4 | 1  | -          | 0.05 | -   | -   | -   |
| BaM-C                        | 9.4  | 1  | -          | -    | -   | 0.3 | 0.2 |

2. X-ray photoelectron spectrum and low temperature Raman spectrum of Na-free BaM nanoparticles prepared with  $\text{NH}_4\text{OH}$  as a pH modifier.

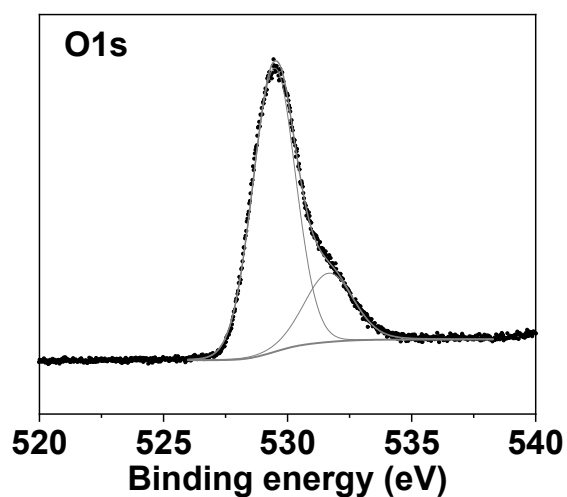

Fig. S1. X-ray photoelectron spectroscopy of Na-free BaM nanoparticles after annealing at  $900^\circ\text{C}$  for 8 hours.

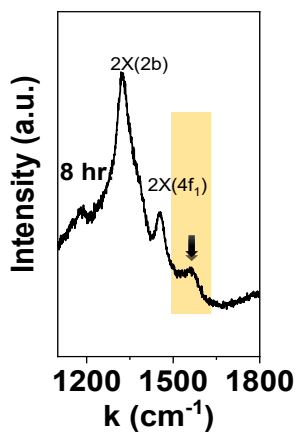

Fig. S2. Low temperature Raman spectrum of Na-free BaM nanoparticles after annealing at  $900^\circ\text{C}$  for 8 hours. Magnon scattering is detected even after extended annealing.

### 3. Thermomagnetic measurement

Thermomagnetic measurement of Curie temperature ( $T_c$ ) was carried out with thermal balance having magnets (Discovery TG55, TA instruments). The measured  $T_c$  was ca. 455°C irrespective of annealing time. Sharpness of Hopkinson peak is enhanced for BaM nanoparticles after prolonged annealing, which implies enhanced magnetic homogeneity [Pfeiffer, H.; Schuppel, W. Temperature dependence of the magnetization in fine particle systems and the Hopkinson effect. Application to barium ferrite powders. *J. Mag. Mag. Mater.* **1994**, 130, 92-98.].

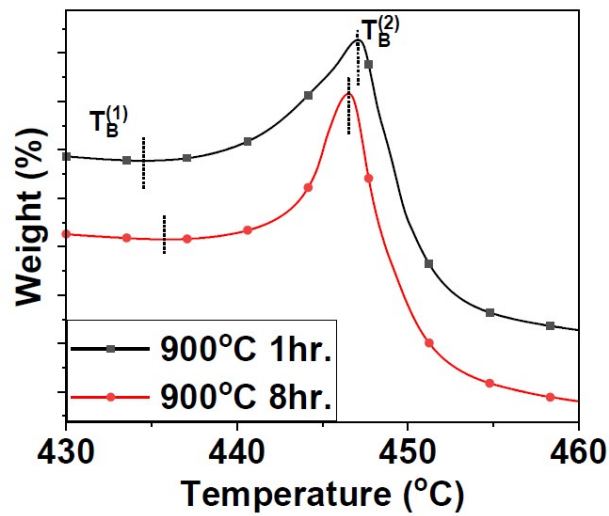

**Figure S3.** Thermomagnetic measurement of BaM nanoparticles showing Hopkinson peaks.
